# Supplementary material for: Alterations of gut microbiota in infants with biliary atresia identified by 16S rRNA-sequencing
Source: Springer Nature journal article supplement (doi:10.1186/s12887-024-04582-9), 2024-02-14
Supplement: MOESM1 [file 26734424]

**Table 1.** Basic characteristics of study participants

|                                              | <b>BA group (n=31)</b> | <b>Control group (n=20)</b> | <b>P-value</b> |
|----------------------------------------------|------------------------|-----------------------------|----------------|
| <b>Age</b> [day, median(range)]              | 70 (39-109)            | 74 (32-119)                 | 0.470          |
| <b>Gender</b>                                |                        |                             | 0.813          |
| Male (n,%)                                   | 16 (51.6%)             | 11 (55%)                    |                |
| Female (n,%)                                 | 15 (48.4%)             | 9 (45%)                     |                |
| <b>Gestational age</b> [week, median(range)] | 38.6 (35-40)           | 39.2 (37-41)                | 0.087          |
| <b>Mode of delivery</b>                      |                        |                             | 0.767          |
| Spontaneous delivery (n,%)                   | 20 (64.5%)             | 14 (70%)                    |                |
| Cesarean section (n,%)                       | 11 (35.5%)             | 6 (30%)                     |                |
| <b>Feeding practice</b>                      |                        |                             | 0.636          |
| Breastfeeding (n,%)                          | 27 (87.1%)             | 19 (95%)                    |                |
| Non-breastfeeding (n,%)                      | 4 (12.9%)              | 1 (5%)                      |                |
