# Supplementary material for: Alterations of gut microbiota in infants with biliary atresia identified by 16S rRNA-sequencing
Source: Springer Nature journal article supplement (doi:10.1186/s12887-024-04582-9), 2024-02-14
Supplement: MOESM2 [file 26734424]

**Supplementary Data1.** Comparison of different microbiota between BA and Control group

| <b>Taxonomy</b>                                                                                 | <b>BA</b> | <b>CON</b> | <b>p-value</b> |
|-------------------------------------------------------------------------------------------------|-----------|------------|----------------|
| Bacteria-Firmicutes-Negativicutes-Selenomonadales-Veillonellaceae-Veillonella                   | 18.24499  | 7.46915    | 0.0206         |
| Bacteria-Proteobacteria-Gammaproteobacteria-Xanthomonadales-Xanthomonadaceae-Lysobacter         | 0.001398  | 0.000684   | 0.01444        |
| Bacteria-Bacteroidetes-Bacteroidia-Bacteroidales-Prevotellaceae-Prevotella_7                    | 0.02076   | 0.012321   | 0.04386        |
| Bacteria-Actinobacteria-Actinobacteria-Bifidobacteriales-Bifidobacteriaceae-Bifidobacterium     | 17.92498  | 28.00987   | 0.03547        |
| Bacteria-Proteobacteria-Alphaproteobacteria-Rhodobacterales-Rhodobacteraceae-Ruegeria           | 0.002159  | 0.000196   | 0.00019        |
| Bacteria-Actinobacteria-Actinobacteria-Micrococcales-Micrococcaceae-Rothia                      | 0.081694  | 0.738039   | 0.01898        |
| Bacteria-Bacteroidetes-Bacteroidia-Flavobacteriales-Flavobacteriaceae-uncultured                | 0.002146  | 0.000251   | 0.00011        |
| Bacteria-Firmicutes-Negativicutes-Selenomonadales-Acidaminococcaceae-Phascolarctobacterium      | 0.000843  | 0.552716   | 0.01817        |
| Bacteria-Firmicutes-Bacilli-Lactobacillales-Streptococcaceae-Streptococcus                      | 5.745462  | 2.347618   | 0.03382        |
| Bacteria-Bacteroidetes-Bacteroidia-Chitinophagales-Chitinophagaceae-Lacibacter                  | 0         | 0.000666   | 0.00001        |
| Bacteria-Firmicutes-Clostridia-Clostridiales-Ruminococcaceae-Fastidiosipila                     | 2.95E-05  | 0.000416   | 0.0435         |
| Bacteria-Actinobacteria-Actinobacteria-Micrococcales-Dermabacteraceae-Brachybacterium           | 0         | 0.00038    | 0.0103         |
| Bacteria-Firmicutes-Clostridia-Clostridiales-Peptostreptococcaceae-Paraclostridium              | 0.014017  | 0.000443   | 0.00828        |
| Bacteria-Bacteroidetes-Bacteroidia-Bacteroidales-Dysgonomonadaceae-Proteiniphilum               | 0         | 0.000273   | 0.0103         |
| Bacteria-Bacteroidetes-Bacteroidia-Cytophagales-Cyclobacteriaceae-Algoriphagus                  | 0.000391  | 0.001464   | 0.00265        |
| Bacteria-Proteobacteria-Gammaproteobacteria-Pasteurellales-Pasteurellaceae-Haemophilus          | 0.229717  | 0.029224   | 0.04331        |
| Bacteria-Tenericutes-Mollicutes-Mycoplasmatales-Mycoplasmataceae-Mycoplasma                     | 0.015583  | 0.001434   | 0.00029        |
| Bacteria-Fibrobacteres-Fibrobacteria-Fibrobacterales-Fibrobacteraceae-Fibrobacter               | 0         | 0.000178   | 0.02783        |
| Bacteria-Bacteroidetes-Bacteroidia-Bacteroidales-Tannerellaceae-Parabacteroides                 | 0.019712  | 2.441066   | 0.04059        |
| Bacteria-Proteobacteria-Gammaproteobacteria-Betaproteobacteriales-Burkholderiaceae-Sphaerotilus | 0.000151  | 0.001045   | 0.00034        |
| Bacteria-Firmicutes-Clostridia-Clostridiales-Ruminococcaceae-Ruminiclostridium_9                | 0.000549  | 0.001417   | 0.01251        |
| Bacteria-Bacteroidetes-Bacteroidia-Flavobacteriales-Flavobacteriaceae-NS5_marine_group          | 0.002813  | 0.000357   | 0.00025        |
| Bacteria-Actinobacteria-Actinobacteria-Propionibacteriales-Nocardioidaceae-Aeromicrobium        | 0.000728  | 0.000181   | 0.02751        |
| Bacteria-Firmicutes-Clostridia-Clostridiales-Clostridiaceae_1-Clostridium_sensu_stricto_1       | 16.52042  | 11.02265   | 0.03382        |

|                                                                                                         |          |          |         |
|---------------------------------------------------------------------------------------------------------|----------|----------|---------|
| Bacteria-Bacteroidetes-Bacteroidia-Flavobacteriales-Flavobacteriaceae-NS3a_marine_group                 | 0.000485 | 6.67E-05 | 0.02695 |
| Bacteria-Actinobacteria-Actinobacteria-Propionibacteriales-Propionibacteriaceae-Microlunatus            | 0.000416 | 0.000595 | 0.0211  |
| Bacteria-Actinobacteria-Actinobacteria-Micromonosporales-Micromonosporaceae-Actinoplanes                | 0.000533 | 6.67E-05 | 0.01822 |
| Bacteria-Proteobacteria-Gammaproteobacteria-Salinisphaerales-Solimonadaceae-Polycyclovorans             | 0        | 0.000205 | 0.02783 |
| Bacteria-Bacteroidetes-Bacteroidia-Bacteroidales-Muribaculaceae-uncultured_Porphyrimonadaceae_bacterium | 0.00097  | 0.000459 | 0.04422 |
| Bacteria-Proteobacteria-Gammaproteobacteria-Oceanospirillales-Alcanivoracaceae-Alcanivorax              | 0.000696 | 0        | 0.00184 |
| Bacteria-Cyanobacteria-Oxyphotobacteria-Chloroplast-Picochlorum_eukaryotum-Picochlorum_eukaryotum       | 0.000404 | 0        | 0.00538 |
| Bacteria-Firmicutes-Bacilli-Bacillales-Family_XII-Exiguobacterium                                       | 0.000441 | 0.000736 | 0.01526 |
| Bacteria-Firmicutes-Erysipelotrichia-Erysipelotrichales-Erysipelotrichaceae-Erysipelatoclostridium      | 0.955439 | 0.125967 | 0.00428 |
| Bacteria-Bacteroidetes-Bacteroidia-Bacteroidales-Bacteroidaceae-Bacteroides                             | 1.99755  | 9.507169 | 0.0092  |
| Bacteria-Tenericutes-Mollicutes-Mycoplasmatales-Mycoplasmataceae-Ureaplasma                             | 0.00027  | 0        | 0.03857 |
| Bacteria-Proteobacteria-Gammaproteobacteria-Enterobacteriales-Enterobacteriaceae-Klebsiella             | 11.7478  | 6.214635 | 0.00336 |
| Bacteria-Actinobacteria-Actinobacteria-Actinomycetales-Actinomycetaceae-Mobiluncus                      | 0        | 0.00041  | 0.02783 |
| Bacteria-Actinobacteria-Actinobacteria-Actinomycetales-Actinomycetaceae-Arcanobacterium                 | 0.000759 | 0.000137 | 0.04218 |
| Bacteria-Firmicutes-Clostridia-Clostridiales-Family_XI-Tissierella                                      | 0        | 0.000511 | 0.00376 |
| Bacteria-Firmicutes-Bacilli-Bacillales-Planococcaceae-Sporosarcina                                      | 0.000207 | 0.001069 | 0.04129 |
| Bacteria-Firmicutes-Bacilli-Lactobacillales-Carnobacteriaceae-Trichococcus                              | 3.32E-05 | 0.000462 | 0.04753 |
| Bacteria-Proteobacteria-Gammaproteobacteria-Alteromonadales-Idiomarinaceae-Idiomarina                   | 0.001073 | 4.57E-05 | 0.01639 |
| Bacteria-Proteobacteria-Gammaproteobacteria-Oceanospirillales-Litoricolaceae-Litoricola                 | 0.001246 | 4.30E-05 | 0.00086 |
| Bacteria-Firmicutes-Clostridia-Clostridiales-Ruminococcaceae-UBA1819                                    | 0.000198 | 0.049923 | 0.00818 |
| Bacteria-Firmicutes-Clostridia-Clostridiales-Ruminococcaceae-Ruminococcus_1                             | 0.000315 | 0.00174  | 0.00089 |
| Bacteria-Fusobacteria-Fusobacteriia-Fusobacteriales-Fusobacteriaceae-Fusobacterium                      | 0.106368 | 0.018029 | 0.03136 |
| Bacteria-Actinobacteria-Actinobacteria-Corynebacteriales-Mycobacteriaceae-Mycobacterium                 | 0.002693 | 0.00053  | 0.00816 |
| Bacteria-Proteobacteria-Gammaproteobacteria-Betaproteobacteriales-Methylophilaceae-OM43_clade           | 0.001092 | 0.000461 | 0.01445 |
